# Supplementary material for: Chitosan–Oxidized Pullulan Hydrogels Loaded with Essential Clove Oil: Synthesis, Characterization, Antioxidant and Antimicrobial Properties
Source: MDPI journal article supplement (doi:10.3390/gels10040227), 2024-03-26
Supplement: s1 [file s1]

# Chitosan–Oxidized Pullulan Hydrogels Loaded with Essential Clove Oil: Synthesis, Characterization, Antioxidant and Antimicrobial Properties

Dana Mihaela Suflet <sup>1</sup>, Marieta Constantin <sup>1,\*</sup>, Irina Mihaela Pelin <sup>1</sup>, Irina Popescu <sup>1</sup>, Cristina M. Rumbu <sup>2</sup>,  
Cristina Elena Horhogeana <sup>2</sup> and Gheorghe Fundueanu <sup>1</sup>

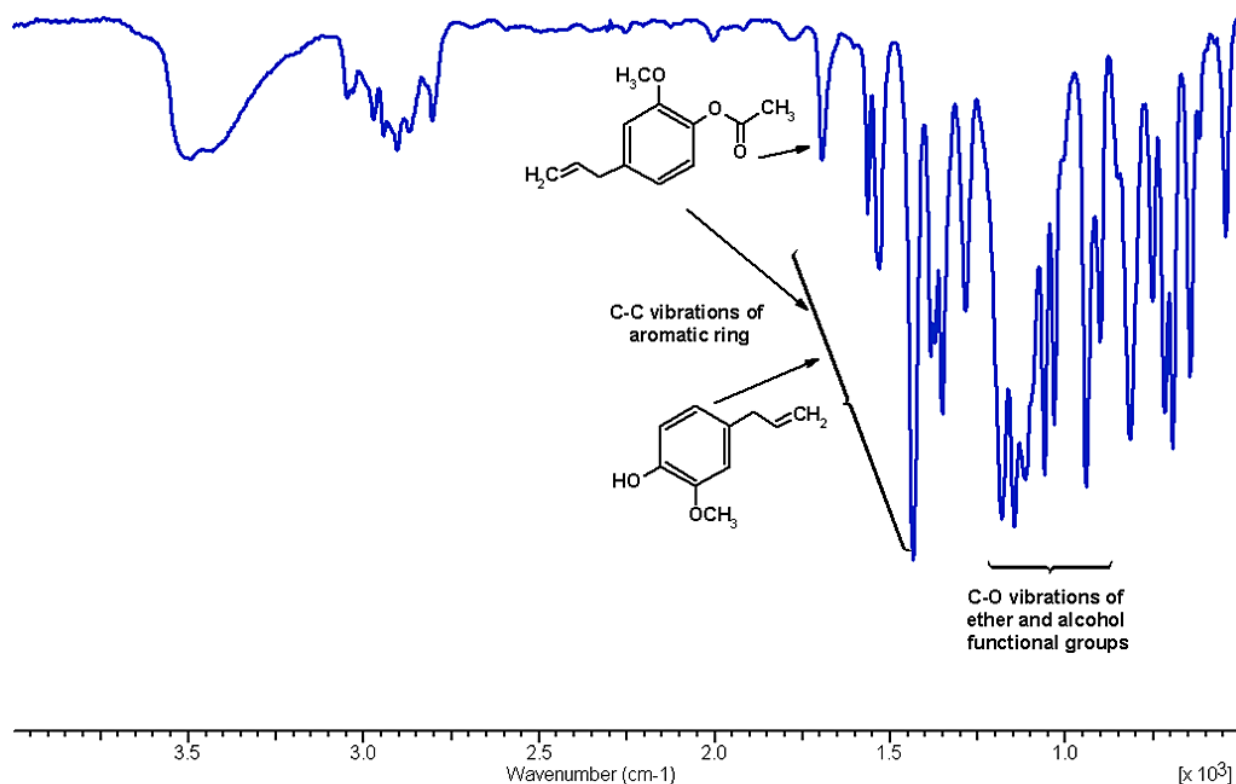

Figure S1. FT-IR spectrum of Clove oil.

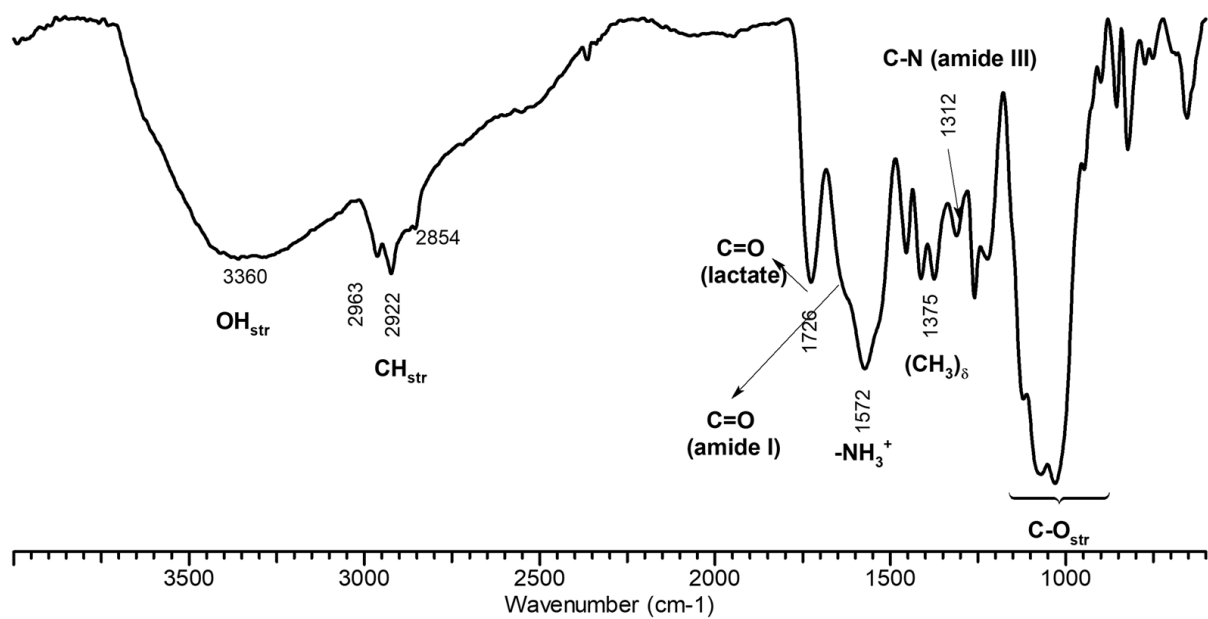

Figure S2. FT-IR spectrum of Chitosan lactate.

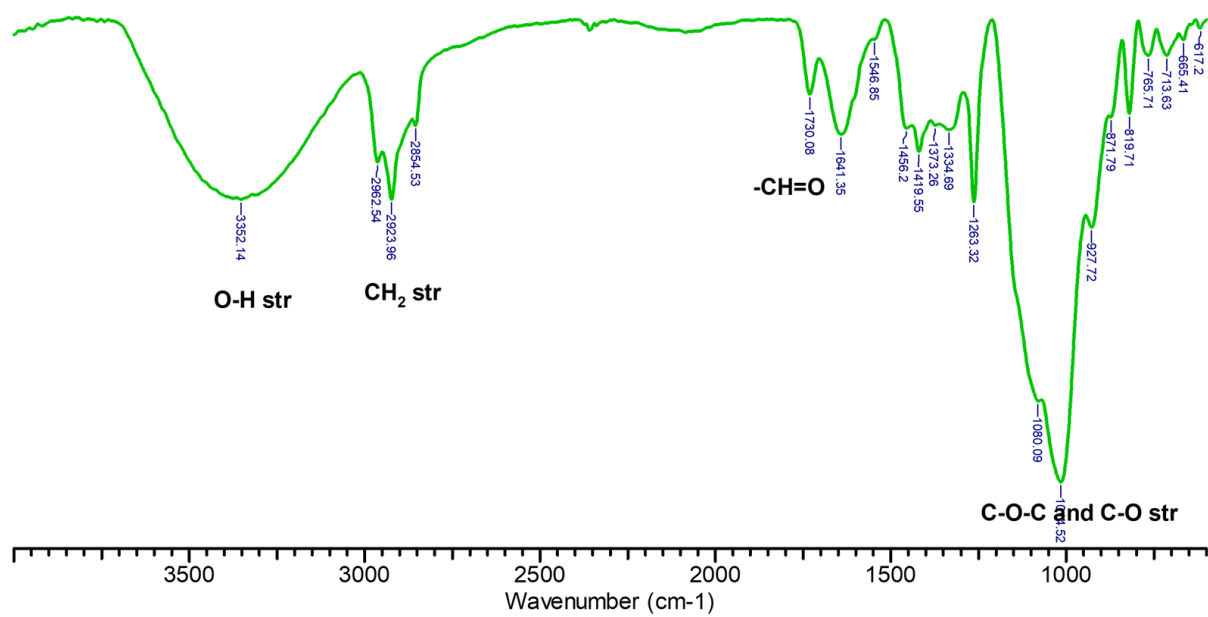

Figure S3. FT-IR spectrum of oxidized pullulan (OP).

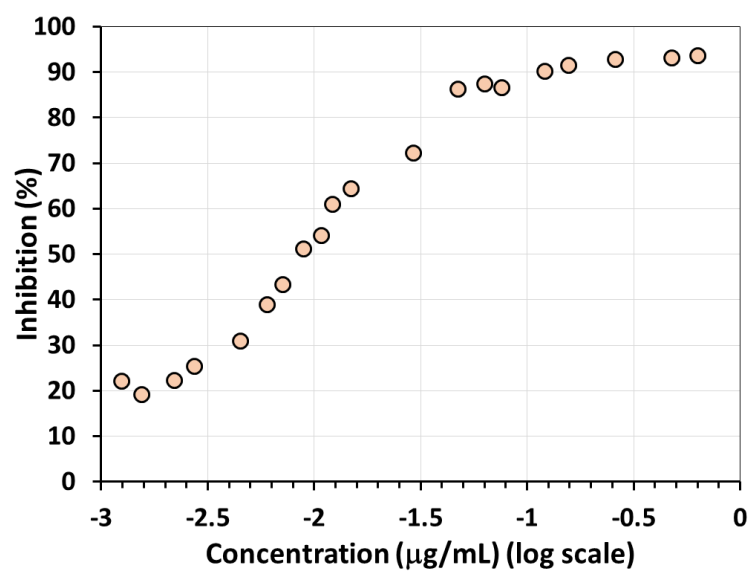

**Figure S4.** DPPH radical scavenging capacity of Clove oil.

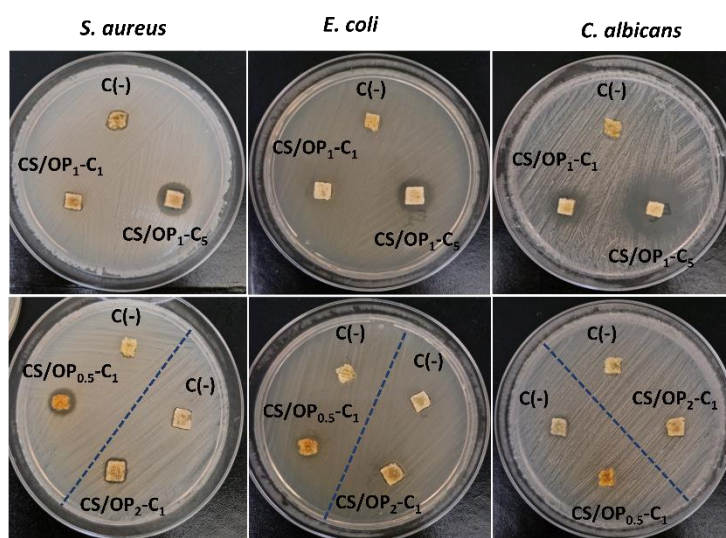

C(-) represents the hydrogel without CO, obtained under the same conditions, CS/OP<sub>x</sub>

**Figure S5.** Antibacterial activity of un-loaded and CO-loaded CS/OP hydrogels against *S. aureus*, *E. coli*, and *C. albicans* through well diffusion assay.
